# Supplementary material for: A randomized feasibility trial of clonidine to reduce perioperative cardiac risk in patients on chronic beta-blockade: the EPIC study
Source: Springer Nature journal article supplement (doi:10.1007/s12630-014-0226-6), 2014-09-05
Supplement: MOESM1 [file 17640386]

**Supplemental Figure:** Trends in cumulative participant recruitment at each study site.

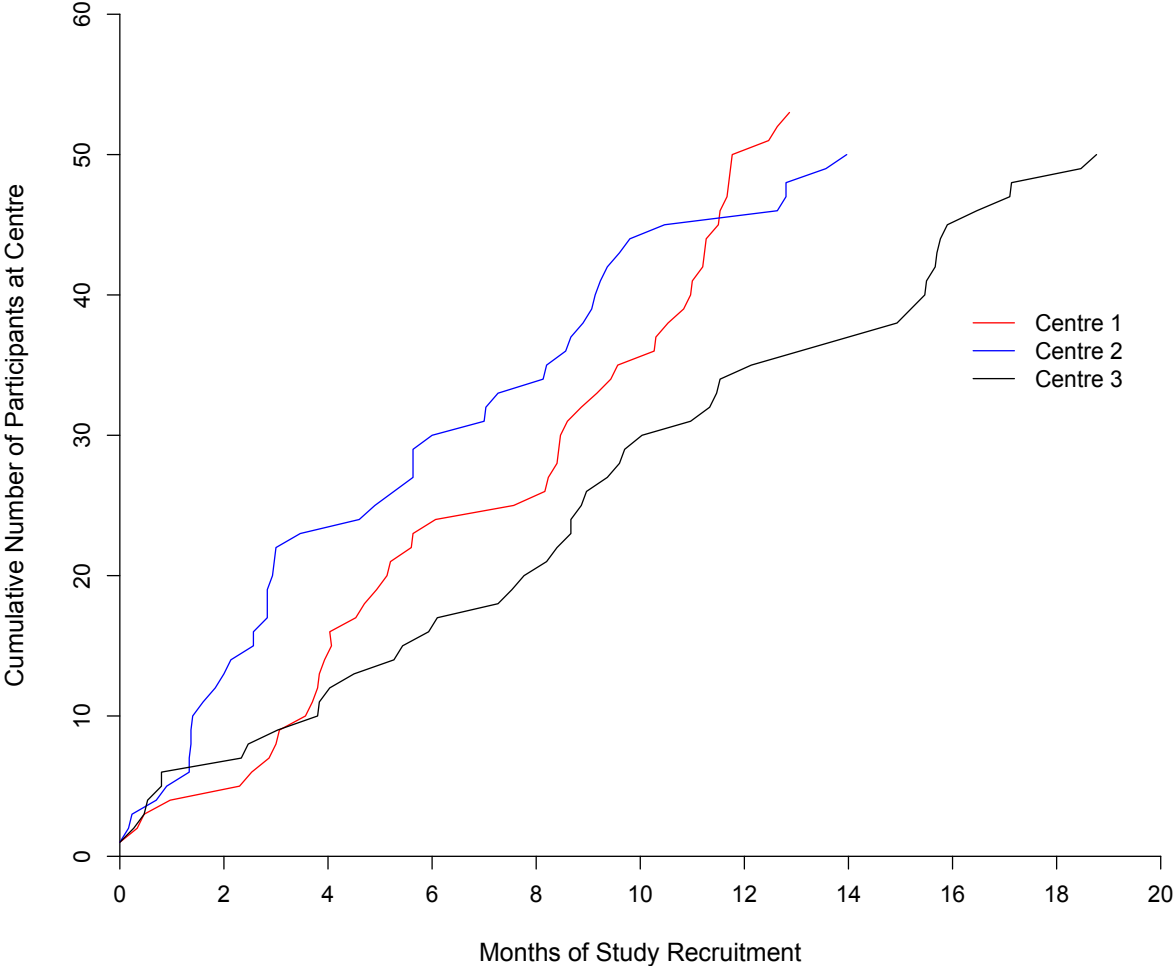

Legend: Trends in the cumulative number of study participants at each study site. These trends are presented for the period *following* the recruitment of the first five participants at each site. The initial period required for recruiting the first five participants was deemed a training period to allow each site to optimize their recruitment procedures.
